# Supplementary material for: Venous Thromboembolism following Two Doses of COVID-19 mRNA Vaccines in the US Population, 2020–2022
Source: MDPI journal article supplement (doi:10.3390/vaccines10081317), 2022-08-15
Supplement: s1 [file s1]

**Supplementary to “Venous Thromboembolism following Two Doses of COVID-19 mRNA Vaccines in the US Population, 2020-2022”**

Daoyuan Lai <sup>1</sup>, Yan Dora Zhang <sup>1,2</sup>, and Junfeng Lu <sup>3,\*</sup>

<sup>1</sup> Department of Statistics and Actuarial Science, Faculty of Science, The University of Hong Kong, Hong Kong, People’s Republic of China

<sup>2</sup> Centre for PanorOmic Sciences, Li Ka Shing Faculty of Medicine, The University of Hong Kong, Hong Kong, People’s Republic of China

<sup>3</sup> First Department of Liver Disease, Beijing You’An Hospital, Capital Medical University, Beijing 100069, People’s Republic of China

**Correspondence:** [junfengdoc@ccmu.edu.cn](mailto:junfengdoc@ccmu.edu.cn)

**Figure S1: Flow chart of the venous thromboembolism cases showing how data from Vaccine Adverse Event Reporting System were used for Self-controlled Case Series analysis**

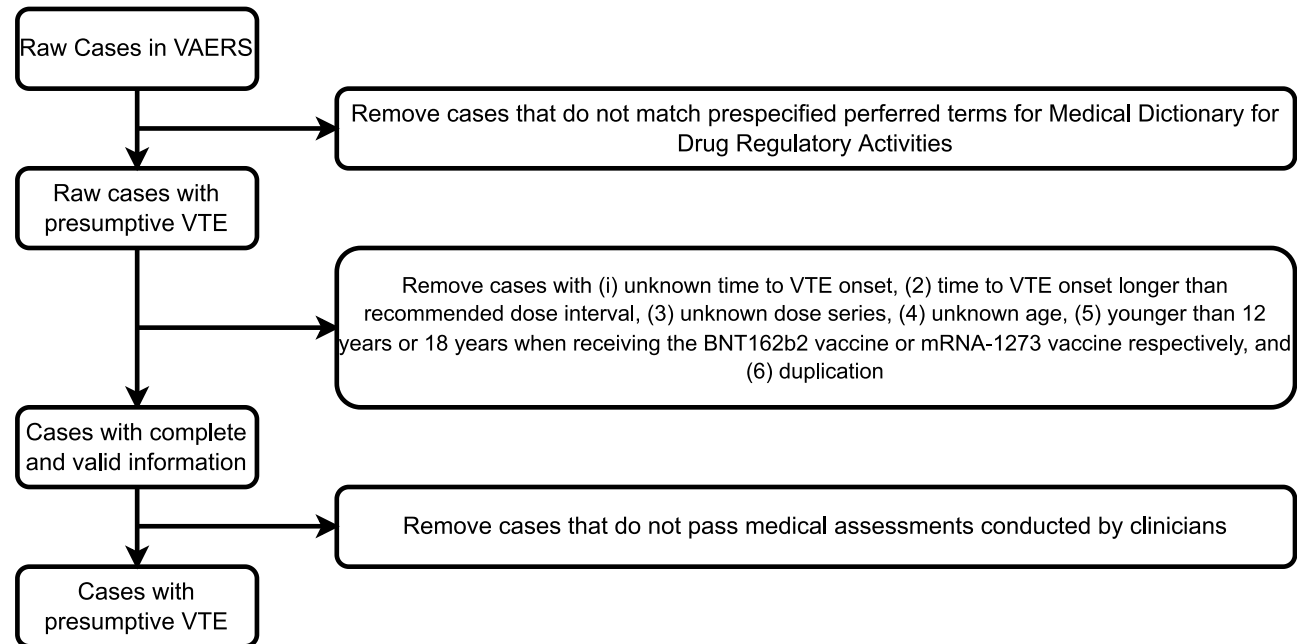

**Figure S2: Visualization of the modified SCCS design using BNT162b2 vaccine as an example.** Risk periods (0, 1–7, 8–14 days after COVID-19 mRNA vaccination) and the baseline periods (15–21 days after exposure) are shown. The reference period ends at day 21 as the recommended dose interval is 21 days for BNT162b2 vaccine.

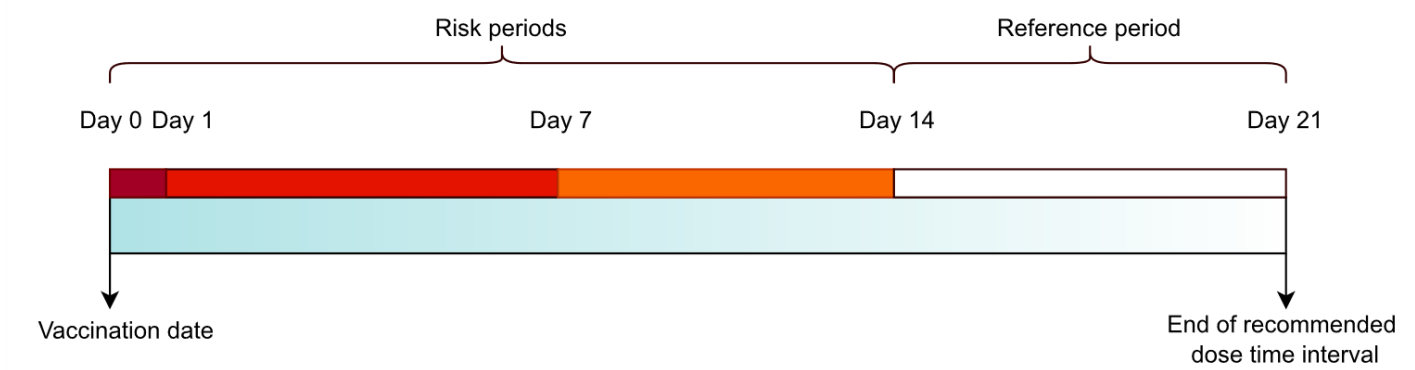

**Table S1:** Ratio of relative incidences and relative incidences of venous thromboembolism following the first and second dose of COVID-19 mRNA vaccination among females, stratified by age

|                 |                                  | No. of Events <sup>a</sup> |                   | RI after dose 1 (95% CI) | RI after dose 2 (95% CI) | Ratio of RIs (95% CI) <sup>b</sup> |
|-----------------|----------------------------------|----------------------------|-------------------|--------------------------|--------------------------|------------------------------------|
|                 |                                  | After dose 1               | After dose 2      |                          |                          |                                    |
| Female, age>=60 |                                  |                            |                   |                          |                          |                                    |
| mRNA-1273       |                                  |                            |                   |                          |                          |                                    |
|                 | No. of days after vaccination, d |                            |                   |                          |                          |                                    |
| 0 <sup>c</sup>  | 11                               | 13                         | 0.81 (0.24, 2.66) | 0.95 (0.29, 3.08)        | 1.18 (0.46, 3.02)        |                                    |
| 1-7             | 48                               | 51                         | 0.69 (0.28, 1.75) | 0.74 (0.3, 1.86)         | 1.06 (0.57, 1.98)        |                                    |
| 8-14            | 29                               | 24                         | 0.76 (0.38, 1.5)  | 0.63 (0.31, 1.26)        | 0.83 (0.4, 1.71)         |                                    |
| 15-28           | 30                               | 28s                        | 1 [Reference]     | 1 [Reference]            | 1 [Reference]            |                                    |
| BNT162b2        |                                  |                            |                   |                          |                          |                                    |
|                 | No. of days after vaccination, d |                            |                   |                          |                          |                                    |
| 0 <sup>c</sup>  | 10                               | 16                         | 0.59 (0.12, 2.85) | 0.52 (0.12, 2.28)        | 0.89 (0.29, 2.68)        |                                    |
| 1-7             | 47                               | 44                         | 0.67 (0.19, 2.35) | 0.35 (0.11, 1.13)        | 0.52 (0.22, 1.25)        |                                    |
| 8-14            | 24                               | 33                         | 0.9 (0.37, 2.3)   | 0.69 (0.32, 1.52)        | 0.76 (0.3, 1.95)         |                                    |
| 15-21           | 8                                | 15                         | 1 [Reference]     | 1 [Reference]            | 1 [Reference]            |                                    |
| Female, age<60  |                                  |                            |                   |                          |                          |                                    |
| mRNA-1273       |                                  |                            |                   |                          |                          |                                    |
|                 | No. of days after vaccination, d |                            |                   |                          |                          |                                    |
| 0 <sup>c</sup>  | 18                               | 11                         | 1.39 (0.44, 4.47) | 1.75 (0.49, 6.22)        | 1.26 (0.49, 3.25)        |                                    |
| 1-7             | 62                               | 59                         | 0.93 (0.37, 2.36) | 1.82 (0.68, 4.95)        | 1.96 (0.99, 3.87)        |                                    |
| 8-14            | 32                               | 29                         | 0.83 (0.42, 1.64) | 1.55 (0.73, 3.39)        | 1.87 (0.87, 4.02)        |                                    |
| 15-28           | 33                               | 14                         | 1 [Reference]     | 1 [Reference]            | 1 [Reference]            |                                    |

| BNT162b2       |    |                                  |                   |                   |                   |  |
|----------------|----|----------------------------------|-------------------|-------------------|-------------------|--|
|                |    | No. of days after vaccination, d |                   |                   |                   |  |
| 0 <sup>c</sup> | 21 | 23                               | 0.70 (0.22, 2.22) | 1.32 (0.4, 4.41)  | 1.9 (0.8, 4.52)   |  |
| 1-7            | 87 | 95                               | 0.64 (0.26, 1.61) | 1.21 (0.46, 3.24) | 1.89 (0.94, 3.81) |  |
| 8-14           | 37 | 33                               | 0.62 (0.33, 1.19) | 0.96 (0.47, 2.04) | 1.55 (0.7, 3.41)  |  |
| 15-21          | 22 | 12                               | 1 [Reference]     | 1 [Reference]     | 1 [Reference]     |  |

Abbreviations: CI, confidence interval; RI, relative incidence

<sup>a</sup> Our analysis excluded (i) reports whose time to symptom onset are unknown or exceed the recommended dose interval to ensure reports were related to a single dose, (ii) reports with unknown dose series, (iii) reports with unknown age, younger than 12 years or 18 years when receiving the BNT162b2 vaccine or mRNA-1273 vaccine respectively, and (iv) duplicated reports.

<sup>b</sup> The ratios are estimated by dividing the relative incidences after dose 2 by the relative incidences after dose 1.

<sup>c</sup> Zero refers to the day of vaccination.

|                |    |    |                   |                   |                   |
|----------------|----|----|-------------------|-------------------|-------------------|
| 0 <sup>c</sup> | 21 | 23 | 0.70 (0.22, 2.22) | 1.32 (0.4, 4.41)  | 1.9 (0.8, 4.52)   |
| 1-7            | 87 | 95 | 0.64 (0.26, 1.61) | 1.21 (0.46, 3.24) | 1.89 (0.94, 3.81) |
| 8-14           | 37 | 33 | 0.62 (0.33, 1.19) | 0.96 (0.47, 2.04) | 1.55 (0.7, 3.41)  |
| 15-21          | 22 | 12 | 1 [Reference]     | 1 [Reference]     | 1 [Reference]     |

21

23

0.70 (0.22, 2.22)

1.32 (0.4, 4.41)

1.9 (0.8, 4.52)

87

95

0.64 (0.26, 1.61)

1.21 (0.46, 3.24)

1.89 (0.94, 3.81)

37

33

0.62 (0.33, 1.19)

0.96 (0.47, 2.04)

1.55 (0.7, 3.41)

22

12

1 [Reference]

1 [Reference]

1 [Reference]

<sup>a</sup> Our analysis excluded (i) reports whose time to symptom onset are unknown or exceed the recommended dose interval to ensure reports were related to a single dose, (ii) reports with unknown dose series, (iii) reports with unknown age, younger than 12 years or 18 years when receiving the BNT162b2 vaccine or mRNA-1273 vaccine respectively, and (iv) duplicated reports.

<sup>c</sup>Zero refers to the day of vaccination.

**Table S2:** Ratio of relative incidences and relative incidences of venous thromboembolism following the first and second dose of COVID-19 mRNA vaccination among males, stratified by age

|                                  |    | No. of Events <sup>a</sup> |                   | RI after dose 1 (95% CI) | RI after dose 2 (95% CI) | Ratio of RIs (95% CI) <sup>b</sup> |
|----------------------------------|----|----------------------------|-------------------|--------------------------|--------------------------|------------------------------------|
|                                  |    | After dose 1               | After dose 2      |                          |                          |                                    |
| Male, age>=60                    |    |                            |                   |                          |                          |                                    |
| mRNA-1273                        |    |                            |                   |                          |                          |                                    |
| No. of days after vaccination, d |    |                            |                   |                          |                          |                                    |
| 0 <sup>c</sup>                   | 7  | 4                          | 0.6 (0.15, 2.39)  | 0.20 (0.04, 0.84)        | 0.33 (0.08, 1.31)        |                                    |
| 1-7                              | 55 | 74                         | 1.04 (0.37, 3.00) | 0.81 (0.30, 2.17)        | 0.78 (0.38, 1.60)        |                                    |
| 8-14                             | 33 | 21                         | 1.41 (0.65, 3.16) | 0.52 (0.24, 1.11)        | 0.37 (0.16, 0.85)        |                                    |
| 15-28                            | 15 | 26                         | 1 [Reference]     | 1 [Reference]            | 1 [Reference]            |                                    |
| BNT162b2                         |    |                            |                   |                          |                          |                                    |
| No. of days after vaccination, d |    |                            |                   |                          |                          |                                    |
| 0 <sup>c</sup>                   | 10 | 12                         | 0.63 (0.14, 2.81) | 0.28 (0.06, 1.17)        | 0.44 (0.14, 1.37)        |                                    |
| 1-7                              | 62 | 53                         | 0.70 (0.21, 2.34) | 0.42 (0.14, 1.28)        | 0.60 (0.26, 1.41)        |                                    |
| 8-14                             | 36 | 16                         | 0.57 (0.23, 1.49) | 0.68 (0.32, 1.45)        | 1.18 (0.45, 3.11)        |                                    |
| 15-21                            | 16 | 9                          | 1 [Reference]     | 1 [Reference]            | 1 [Reference]            |                                    |
| Male, age<60                     |    |                            |                   |                          |                          |                                    |
| mRNA-1273                        |    |                            |                   |                          |                          |                                    |
| No. of days after vaccination, d |    |                            |                   |                          |                          |                                    |
| 0 <sup>c</sup>                   | 14 | 3                          | 1.36 (0.38, 4.84) | 0.51 (0.09, 2.48)        | 0.38 (0.09, 1.51)        |                                    |
| 1-7                              | 45 | 47                         | 0.83 (0.31, 2.30) | 1.53 (0.54, 4.47)        | 1.84 (0.90, 3.79)        |                                    |
| 8-14                             | 32 | 22                         | 1.00 (0.49, 2.07) | 1.22 (0.54, 2.79)        | 1.21 (0.54, 2.71)        |                                    |
| 15-28                            | 27 | 17                         | 1 [Reference]     | 1 [Reference]            | 1 [Reference]            |                                    |
| BNT162b2                         |    |                            |                   |                          |                          |                                    |

| No. of days after vaccination, d                                                                                                                                                                                                                                                                                                                                                             |    |    |                   |                   |                   |
|----------------------------------------------------------------------------------------------------------------------------------------------------------------------------------------------------------------------------------------------------------------------------------------------------------------------------------------------------------------------------------------------|----|----|-------------------|-------------------|-------------------|
| 0 <sup>c</sup>                                                                                                                                                                                                                                                                                                                                                                               | 4  | 8  | 0.18 (0.03, 0.84) | 0.42 (0.1, 1.76)  | 2.35 (0.60, 9.20) |
| 1-7                                                                                                                                                                                                                                                                                                                                                                                          | 61 | 63 | 0.60 (0.21, 1.75) | 0.73 (0.25, 2.16) | 1.22 (0.58, 2.54) |
| 8-14                                                                                                                                                                                                                                                                                                                                                                                         | 30 | 24 | 0.67 (0.32, 1.40) | 0.63 (0.29, 1.38) | 0.94 (0.41, 2.18) |
| 15-21                                                                                                                                                                                                                                                                                                                                                                                        | 17 | 17 | 1 [Reference]     | 1 [Reference]     | 1 [Reference]     |
| Abbreviations: CI, confidence interval; RI, relative incidence                                                                                                                                                                                                                                                                                                                               |    |    |                   |                   |                   |
| <sup>a</sup> Our analysis excluded (i) reports whose time to symptom onset are unknown or exceed the recommended dose interval to ensure reports were related to a single dose, (ii) reports with unknown dose series, (iii) reports with unknown age, younger than 12 years or 18 years when receiving the BNT162b2 vaccine or mRNA-1273 vaccine respectively, and (iv) duplicated reports. |    |    |                   |                   |                   |
| <sup>b</sup> The ratios are estimated by dividing the relative incidences after dose 2 by the relative incidences after dose 1.                                                                                                                                                                                                                                                              |    |    |                   |                   |                   |
| <sup>c</sup> Zero refers to the day of vaccination.                                                                                                                                                                                                                                                                                                                                          |    |    |                   |                   |                   |

**Table S3:** Ratio of relative incidences and relative incidences of venous thromboembolism following the first and second dose of COVID-19 mRNA vaccination, assuming 80% of reports can meet the Brighton Collaboration Criteria ultimately<sup>a</sup>

|                                                                                                                                                                                                                                                                                                                                                                                               |                                  | No. of Events |              | RI following dose 1<br>(95% CI) | RI following dose 2<br>(95% CI) | Ratio of RIs (95% CI) |
|-----------------------------------------------------------------------------------------------------------------------------------------------------------------------------------------------------------------------------------------------------------------------------------------------------------------------------------------------------------------------------------------------|----------------------------------|---------------|--------------|---------------------------------|---------------------------------|-----------------------|
|                                                                                                                                                                                                                                                                                                                                                                                               |                                  | After dose 1  | After dose 2 |                                 |                                 |                       |
| <b>mRNA-1273</b>                                                                                                                                                                                                                                                                                                                                                                              |                                  |               |              |                                 |                                 |                       |
|                                                                                                                                                                                                                                                                                                                                                                                               | No. of days after vaccination, d |               |              |                                 |                                 |                       |
|                                                                                                                                                                                                                                                                                                                                                                                               | 0 <sup>c</sup>                   | 45            | 27           | 1.31 (0.67, 2.58)               | 1.08 (0.52, 2.23)               | 0.82 (0.47, 1.45)     |
|                                                                                                                                                                                                                                                                                                                                                                                               | 1-7                              | 163           | 188          | 0.91 (0.54, 1.55)               | 1.44 (0.84, 2.49)               | 1.59 (1.10, 2.29)     |
|                                                                                                                                                                                                                                                                                                                                                                                               | 8-14                             | 108           | 79           | 1.02 (0.70, 1.50)               | 1.03 (0.68, 1.57)               | 1.01 (0.66, 1.53)     |
|                                                                                                                                                                                                                                                                                                                                                                                               | 15-28                            | 89            | 66           | 1 [Reference]                   | 1 [Reference]                   | 1 [Reference]         |
| <b>BNT162b2</b>                                                                                                                                                                                                                                                                                                                                                                               |                                  |               |              |                                 |                                 |                       |
|                                                                                                                                                                                                                                                                                                                                                                                               | No. of days after vaccination, d |               |              |                                 |                                 |                       |
|                                                                                                                                                                                                                                                                                                                                                                                               | 0 <sup>c</sup>                   | 36            | 48           | 0.62 (0.29, 1.34)               | 0.81 (0.38, 1.72)               | 1.31 (0.74, 2.32)     |
|                                                                                                                                                                                                                                                                                                                                                                                               | 1-7                              | 198           | 225          | 0.75 (0.41, 1.35)               | 0.83 (0.46, 1.51)               | 1.12 (0.73, 1.70)     |
|                                                                                                                                                                                                                                                                                                                                                                                               | 8-14                             | 82            | 102          | 0.68 (0.44, 1.04)               | 0.83 (0.55, 1.26)               | 1.22 (0.76, 1.96)     |
|                                                                                                                                                                                                                                                                                                                                                                                               | 15-21                            | 49            | 46           | 1 [Reference]                   | 1 [Reference]                   | 1 [Reference]         |
| Abbreviations: CI, confidence interval; RI, relative incidence                                                                                                                                                                                                                                                                                                                                |                                  |               |              |                                 |                                 |                       |
| <sup>a</sup> Our analysis excluded (i) reports whose time to symptom onset are unknown or exceed the recommended dose interval to ensure reports were related to a single dose, (ii) reports with unknown dose series, (iii) reports with unknown age, younger than 12 years or 18 years when receiving the BNT162b2 vaccine or mRNA-1273 vaccine, respectively, and (iv) duplicated reports. |                                  |               |              |                                 |                                 |                       |
| <sup>b</sup> The ratios are estimated by dividing the relative incidences following dose 2 by the relative incidences following dose 1.                                                                                                                                                                                                                                                       |                                  |               |              |                                 |                                 |                       |
| <sup>c</sup> Zero refers to the day of vaccination.                                                                                                                                                                                                                                                                                                                                           |                                  |               |              |                                 |                                 |                       |



**Table S4:** Ratio of relative incidences and relative incidences of venous thromboembolism following the first and second dose of COVID-19 mRNA vaccination, after excluding all deceased patients<sup>a</sup>

|                                                                                                                                                                                                                                                                                                                                                                                               |                                  | No. of Events |              | RI following dose 1<br>(95% CI) | RI following dose 2<br>(95% CI) | Ratio of RIs (95% CI) |
|-----------------------------------------------------------------------------------------------------------------------------------------------------------------------------------------------------------------------------------------------------------------------------------------------------------------------------------------------------------------------------------------------|----------------------------------|---------------|--------------|---------------------------------|---------------------------------|-----------------------|
|                                                                                                                                                                                                                                                                                                                                                                                               |                                  | After dose 1  | After dose 2 |                                 |                                 |                       |
| <b>mRNA-1273</b>                                                                                                                                                                                                                                                                                                                                                                              |                                  |               |              |                                 |                                 |                       |
|                                                                                                                                                                                                                                                                                                                                                                                               | No. of days after vaccination, d |               |              |                                 |                                 |                       |
|                                                                                                                                                                                                                                                                                                                                                                                               | 0 <sup>c</sup>                   | 45            | 27           | 1.31 (0.67, 2.58)               | 1.08 (0.52, 2.23)               | 0.82 (0.47, 1.45)     |
|                                                                                                                                                                                                                                                                                                                                                                                               | 1-7                              | 163           | 188          | 0.91 (0.54, 1.55)               | 1.44 (0.84, 2.49)               | 1.59 (1.10, 2.29)     |
|                                                                                                                                                                                                                                                                                                                                                                                               | 8-14                             | 108           | 79           | 1.02 (0.70, 1.50)               | 1.03 (0.68, 1.57)               | 1.01 (0.66, 1.53)     |
|                                                                                                                                                                                                                                                                                                                                                                                               | 15-28                            | 89            | 66           | 1 [Reference]                   | 1 [Reference]                   | 1 [Reference]         |
| <b>BNT162b2</b>                                                                                                                                                                                                                                                                                                                                                                               |                                  |               |              |                                 |                                 |                       |
|                                                                                                                                                                                                                                                                                                                                                                                               | No. of days after vaccination, d |               |              |                                 |                                 |                       |
|                                                                                                                                                                                                                                                                                                                                                                                               | 0 <sup>c</sup>                   | 36            | 48           | 0.62 (0.29, 1.34)               | 0.81 (0.38, 1.72)               | 1.31 (0.74, 2.32)     |
|                                                                                                                                                                                                                                                                                                                                                                                               | 1-7                              | 198           | 225          | 0.75 (0.41, 1.35)               | 0.83 (0.46, 1.51)               | 1.12 (0.73, 1.70)     |
|                                                                                                                                                                                                                                                                                                                                                                                               | 8-14                             | 82            | 102          | 0.68 (0.44, 1.04)               | 0.83 (0.55, 1.26)               | 1.22 (0.76, 1.96)     |
|                                                                                                                                                                                                                                                                                                                                                                                               | 15-21                            | 49            | 46           | 1 [Reference]                   | 1 [Reference]                   | 1 [Reference]         |
| Abbreviations: CI, confidence interval; RI, relative incidence                                                                                                                                                                                                                                                                                                                                |                                  |               |              |                                 |                                 |                       |
| <sup>a</sup> Our analysis excluded (i) reports whose time to symptom onset are unknown or exceed the recommended dose interval to ensure reports were related to a single dose, (ii) reports with unknown dose series, (iii) reports with unknown age, younger than 12 years or 18 years when receiving the BNT162b2 vaccine or mRNA-1273 vaccine, respectively, and (iv) duplicated reports. |                                  |               |              |                                 |                                 |                       |
| <sup>b</sup> The ratios are estimated by dividing the relative incidences following dose 2 by the relative incidences following dose 1.                                                                                                                                                                                                                                                       |                                  |               |              |                                 |                                 |                       |
| <sup>c</sup> Zero refers to the day of vaccination.                                                                                                                                                                                                                                                                                                                                           |                                  |               |              |                                 |                                 |                       |
